# Supplementary material for: The use of magnesium sulfate can reduce the mortality risk of cirrhosis patients: a retrospective cohort study
Source: Frontiers journal article supplement (doi:10.3389/fphar.2025.1551495), 2025-10-20
Supplement: Data_Sheet_1.xlsx [file Data_Sheet_1.xlsx]

## Sheet: supplementary material 1
Supplementary material 1 Cirrhosis ICD version and code
icd_code	icd_version	long_title	count
5715	9	Cirrhosis of liver without mention of alcohol	6100
5712	9	Alcoholic cirrhosis of liver	4321
K7469	10	Other cirrhosis of liver	3305
K7031	10	Alcoholic cirrhosis of liver with ascites	3196
K7030	10	Alcoholic cirrhosis of liver without ascites	3021
K7460	10	Unspecified cirrhosis of liver	2876
K743	10	Primary biliary cirrhosis	376
5716	9	Biliary cirrhosis	360
K745	10	Biliary cirrhosis, unspecified	31
K744	10	Secondary biliary cirrhosis	16
K717	10	Toxic liver disease with fibrosis and cirrhosis of liver	14

## Sheet: supplementary material 4
Supplementary material 4 Variance inflation factor for each variable included in the matching cohort for multivariate logistics regression.
variable	vif_values
gender	1.118
admission_age	2.057
rbc	1.359
wbc	1.396
platelet	1.341
sodium	4.001
creatinine	2.623
bun	2.503
potassium	1.265
bicarbonate	1.884
calcium	1.208
chloride	4.107
magnesium	1.396
heart_rate_mean	1.46
mbp_mean	1.484
resp_rate_mean	1.445
temperature_mean	1.229
spo2_mean	1.228
myocardial_infarct	1.12
congestive_heart_failure	1.373
peripheral_vascular_disease	1.05
chronic_pulmonary_disease	1.147
diabetes	1.276
renal_disease	1.746
malignant_cancer	1.665
hypertension	1.168
charlson_comorbidity_index	3.554
meld	3.403
sapsii	2.828
sofa	1.895
sepsis	1.443
ascites	1.397
hps	1.038
crrt	1.336
ventilation	1.233
hs	1.377
he	1.146
ph	1.252
diarrhea	1.045
sbp	1.131
aki_stage	1.319
Magnesium_sulfate	1.025

## Sheet: supplementary material 5
Supplementary material 5 Association between magnesium sulfate and clinical outcomes in cirrhosis.(Whole Cohort)
	Model1			Model2
	OR/HR (95%CI)	P		OR/HR (95%CI)	P
In-hospital all-cause mortality
magnesium sulfate
No	1.00 (Reference)			1.00 (Reference)
Yes	0.54 (0.45 ~ 0.65)	<.001		0.48 (0.37 ~ 0.64)	<.001
180-day all-cause mortality
magnesium sulfate
No	1.00 (Reference)			1.00 (Reference)
Yes	0.61 (0.54 ~ 0.68)	<.001		0.60 (0.52 ~ 0.69)	<.001
OR: Odds Ratio, CI: Confidence Interval HR: Hazard Ratio, CI: Confidence Interval
Model1: Crude
Model2: Adjust: admission_age, gender, rbc, wbc, platelet, sodium, creatinine, bun,
potassium, bicarbonate, calcium, chloride, magnesium, heart_rate_mean, mbp_mean, resp_rate_mean,
temperature_mean, spo2_mean, myocardial_infarct, congestive_heart_failure,
peripheral_vascular_disease, chronic_pulmonary_disease, diabetes, renal_disease,
malignant_cancer, charlson_comorbidity_index, hypertension, meld, sapsii, sepsis, sofa,
ascites, hps, crrt, ventilation, hs, he, ph, diarrhea, sbp, aki

## Sheet: supplementary material 8
Supplementary material 8 Association between magnesium sulfate and clinical outcomes in cirrhosis.(Excluding Septicemia Cohort Before PSM)
	Model1			Model2
	OR/HR (95%CI)	P		OR/HR (95%CI)	P
In-hospital all-cause mortality
magnesium sulfate
No	1.00 (Reference)			1.00 (Reference)
Yes	0.49(0.39 ~ 0.63)	<.001		0.67 (0.46~ 0.97)	0.036
180-day all-cause mortality
magnesium sulfate
No	1.00 (Reference)			1.00 (Reference)
Yes	0.55 (0.47 ~ 0.64)	<.001		0.76 (0.62 ~ 0.94)	0.005
OR: Odds Ratio, CI: Confidence Interval HR: Hazard Ratio, CI: Confidence Interval
Model1: Crude
Model2: Adjust: admission_age, gender, rbc, wbc, platelet, sodium, creatinine, bun,
potassium, bicarbonate, calcium, chloride, magnesium, heart_rate_mean, mbp_mean, resp_rate_mean,
temperature_mean, spo2_mean, myocardial_infarct, congestive_heart_failure,
peripheral_vascular_disease, chronic_pulmonary_disease, diabetes, renal_disease,
malignant_cancer, charlson_comorbidity_index, hypertension, meld, sapsii, sepsis, sofa,
ascites, hps, crrt, ventilation, hs, he, ph, diarrhea, sbp, aki

## Sheet: supplementary material 11
Supplementary material 11 Association between magnesium sulfate and clinical outcomes in cirrhosis.(Cohort Excluding Patients Who Received Oral Magnesium Preparations)
	Model1			Model2
	OR/HR (95%CI)	P		OR/HR (95%CI)	P
In-hospital all-cause mortality
magnesium sulfate
No	1.00 (Reference)			1.00 (Reference)
Yes	0.53 (0.44 ~ 0.64)	<.001		0.48 (0.36 ~ 0.64)	<.001
180-day all-cause mortality
magnesium sulfate
No	1.00 (Reference)			1.00 (Reference)
Yes	0.60 (0.53 ~ 0.67)	<.001		0.60 (0.52 ~ 0.69)	<.001
OR: Odds Ratio, CI: Confidence Interval HR: Hazard Ratio, CI: Confidence Interval
Model1: Crude
Model2: Adjust: admission_age, gender, rbc, wbc, platelet, sodium, creatinine, bun,
potassium, bicarbonate, calcium, chloride, magnesium, heart_rate_mean, mbp_mean, resp_rate_mean,
temperature_mean, spo2_mean, myocardial_infarct, congestive_heart_failure,
peripheral_vascular_disease, chronic_pulmonary_disease, diabetes, renal_disease,
malignant_cancer, charlson_comorbidity_index, hypertension, meld, sapsii, sepsis, sofa,
ascites, hps, crrt, ventilation, hs, he, ph, diarrhea, sbp, aki

## Sheet: supplementary material 14
Supplementary material 14 chronic renal failure ICD version and code
icd_code	icd_version	long_title
N184	10	Chronic kidney disease, stage 4 (severe)
N185	10	Chronic kidney disease, stage 5
N186	10	End stage renal disease
I120	10	Hypertensive chronic kidney disease with stage 5 chronic kidney disease or end stage renal disease
I1311	10	Hypertensive heart and chronic kidney disease without heart failure, with stage 5 chronic kidney disease, or end stage renal disease
I132	10	Hypertensive heart and chronic kidney disease with heart failure and with stage 5 chronic kidney disease, or end stage renal disease
40301	9	Hypertensive chronic kidney disease, malignant, with chronic kidney disease stage V or end stage renal disease
40311	9	Hypertensive chronic kidney disease, benign, with chronic kidney disease stage V or end stage renal disease
40391	9	Hypertensive chronic kidney disease, unspecified, with chronic kidney disease stage V or end stage renal disease
40402	9	Hypertensive heart and chronic kidney disease, malignant, without heart failure and with chronic kidney disease stage V or end stage renal disease
40403	9	Hypertensive heart and chronic kidney disease, malignant, with heart failure and with chronic kidney disease stage V or end stage renal disease
40412	9	Hypertensive heart and chronic kidney disease, benign, without heart failure and with chronic kidney disease stage V or end stage renal disease
40413	9	Hypertensive heart and chronic kidney disease, benign, with heart failure and chronic kidney disease stage V or end stage renal disease
40492	9	Hypertensive heart and chronic kidney disease, unspecified, without heart failure and with chronic kidney disease stage V or end stage renal disease
40493	9	Hypertensive heart and chronic kidney disease, unspecified, with heart failure and chronic kidney disease stage V or end stage renal disease
5856	9	End stage renal disease

## Sheet: supplementary material 15
Supplementary material 15 heart block ICD version and code
icd_code	icd_version	long_title
4260	9	Atrioventricular block, complete
42610	9	Atrioventricular block, unspecified
42611	9	First degree atrioventricular block
42612	9	Mobitz (type) II atrioventricular block
42613	9	Other second degree atrioventricular block
4262	9	Left bundle branch hemiblock
4263	9	Other left bundle branch block
4264	9	Right bundle branch block
42650	9	Bundle branch block, unspecified
42651	9	Right bundle branch block and left posterior fascicular block
42652	9	Right bundle branch block and left anterior fascicular block
42653	9	Other bilateral bundle branch block
42654	9	Trifascicular block
4266	9	Other heart block
74686	9	Congenital heart block
I44	10	Atrioventricular and left bundle-branch block
I440	10	Atrioventricular block, first degree
I441	10	Atrioventricular block, second degree
I442	10	Atrioventricular block, complete
I443	10	Other and unspecified atrioventricular block
I4430	10	Unspecified atrioventricular block
I4439	10	Other atrioventricular block
I444	10	Left anterior fascicular block
I445	10	Left posterior fascicular block
I446	10	Other and unspecified fascicular block
I4460	10	Unspecified fascicular block
I4469	10	Other fascicular block
I447	10	Left bundle-branch block, unspecified
I450	10	Right fascicular block
I451	10	Other and unspecified right bundle-branch block
I4510	10	Unspecified right bundle-branch block
I4519	10	Other right bundle-branch block
I452	10	Bifascicular block
I453	10	Trifascicular block
I454	10	Nonspecific intraventricular block
I455	10	Other specified heart block
Q246	10	Congenital heart block
